# Supplementary material for: Secretory pathway Ca2+-ATPase SPCA2 regulates mitochondrial respiration and DNA damage response through store-independent calcium entry
Source: PubMed Central journal article supplement — Redox Biol. 2022 Jan 17;50:102240. doi: 10.1016/j.redox.2022.102240 (PMC8783100; doi:10.1016/j.redox.2022.102240), 2022-01-17
Supplement: mmc1.pdf [file mmc1.pdf]

## SUPPLEMENTARY MATERIAL

| Gene name                                         | Microarray     |              |             |                | qPCR         |         |
|---------------------------------------------------|----------------|--------------|-------------|----------------|--------------|---------|
|                                                   | Gene symbol    | Probeset ID  | Fold Change | Pseudo P-value | Fold Change  | P-value |
| Cyclin dependent kinase inhibitor 1A              | <i>CDKN1A</i>  | 202284_s_at  | 2.94        | **             | 3.02 ± 0.48  | **      |
| Cyclin dependent kinase 4                         | <i>CDK4</i>    | 202246_s_at  | -1.14       | *              | -2.09 ± 0.15 | *       |
| BCL2 associated X, apoptosis regulator            | <i>BAX</i>     | 211833_s_at  | 1.29        | *              | 1.75 ± 0.217 | *       |
| BCL2 like 11                                      | <i>BCL2L11</i> | 1558143_a_at | 1.17        | *              | 2.32 ± 0.166 | *       |
| BCL2 binding component 3                          | <i>BBC3</i>    | 211692_s_at  | -1.04       | ns             | 3.98 ± 1.02  | *       |
| Phorbol-12-myristate-13-acetate-induced protein 1 | <i>PMAIP1</i>  | 204285_s_at  | 1.36        | ns             | 5.01 ± 1.90  | *       |
| Fas ligand                                        | <i>FASLG</i>   | 211333_s_at  | 1.04        | ns             | 5.04 ± 1.11  | **      |

\*p&lt; 0.05; \*\*p&lt;0.01

**Table S1:** Representative set of p53 pathway genes in MCF-7 cells altered by SPCA2KD. Comparison of a subset of p53 pathway genes determined to be differentially expressed in the microarray (n = 2) to expression measured by qPCR (n = 3). For genes that contain multiple probe sets in the Affymetrix Human Genome U133 Plus 2.0 Array, a representative value was selected, typically the value of highest significance.

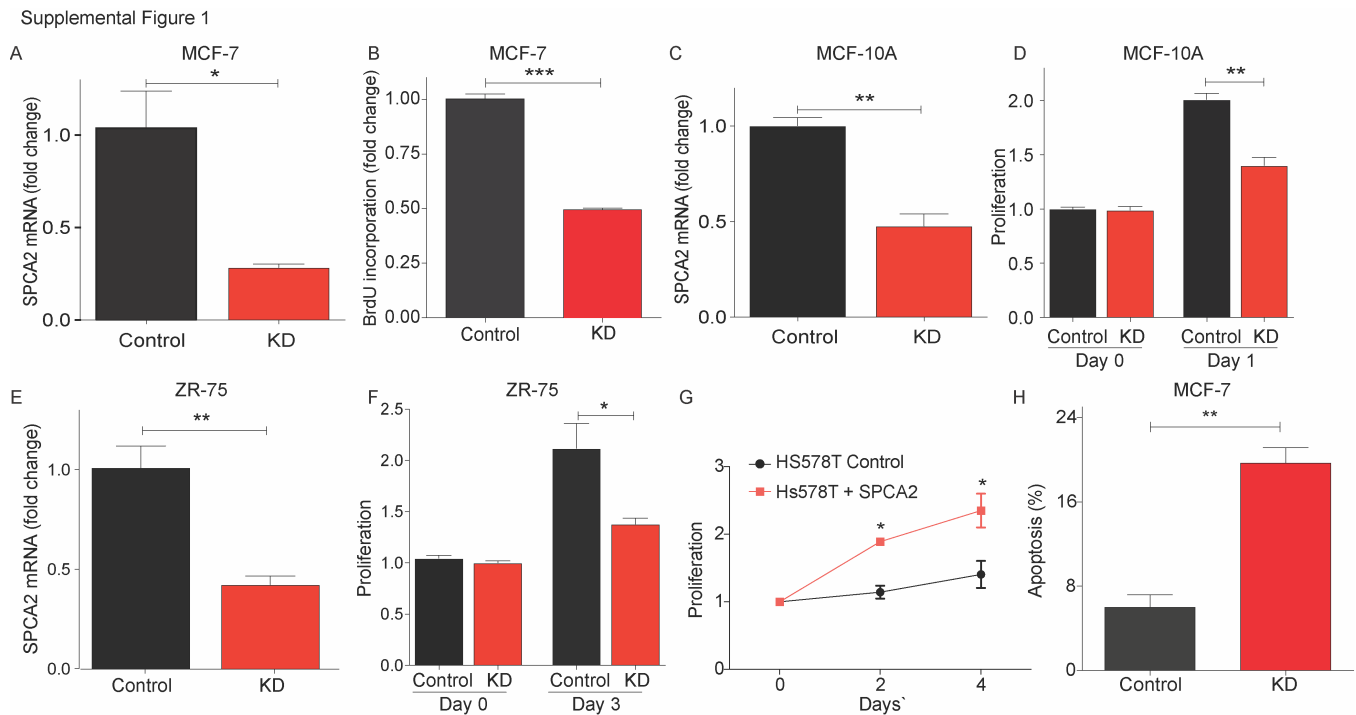

**Figure S1: SPCA2 drives cell cycle progression and survival**

(A) Knockdown of SPCA2 (SPCA2 KD) in MCF-7 cells was confirmed by qPCR,  $n=3$ . (B) SPCA2 KD in MCF-7 significantly decreased BrdU incorporation compared to control ( $n=6$  for control,  $n=5$  for KD). (C) Knockdown of SPCA2 in MCF-10A cells was confirmed by qPCR,  $n=3$ . (D) SPCA2 KD in MCF-10A significantly decreased cell proliferation compared to control,  $n=3$ . (E) Knockdown of SPCA2 in ZR-75 cells was confirmed by qPCR,  $n=3$ . (F) SPCA2 KD in ZR-75 significantly decreased cell proliferation compared to control,  $n=3$ . (G) SPCA2 overexpression (using silencing resistant construct SPCA2R) in HS578T increased cell proliferation compared to vector control,  $n=3$ . (H) SPCA2 KD significantly increased percentage of apoptotic cells compared to control,  $n=3$ . Significance: \* $P < 0.05$ , \*\* $P < 0.01$ , \*\*\* $P < 0.001$ .

Supplemental Figure 2

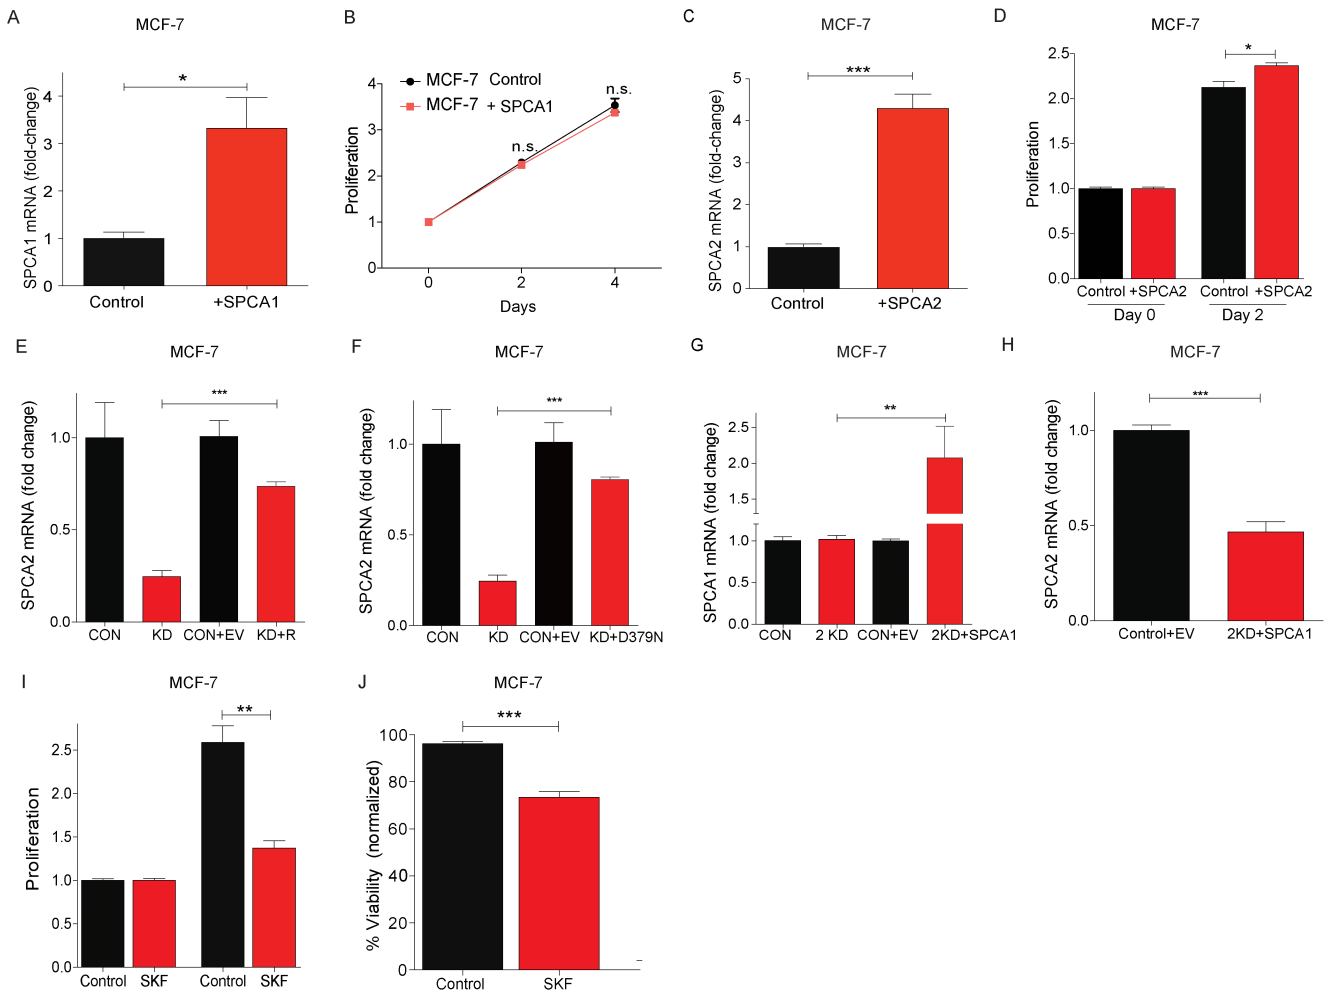

**Figure S2: ATPase deficient mutation in SPCA2 does not block cell proliferation or Ca<sup>2+</sup> entry**

(A) Overexpression of SPCA1 in MCF-7 cells was confirmed by qPCR, n=3. (B) SPCA1 overexpression in MCF-7 did not significantly increase cell proliferation compared to vector control, n=3. (C) Overexpression of SPCA2 in MCF-7 cells was confirmed by qPCR, n=3. (D) SPCA2 overexpression in MCF-7 significantly increased cell proliferation compared to vector control, n=3. (E-F) SPCA2 transcript levels measured by qPCR in MCF-7 control, SPCA2 knockdown (KD), and after transfection with empty vector (EV), recombinant, silencing-resistant SPCA2R construct (R) or mutant D379N, as indicated n=3. (G) SPCA1 transcript was significantly increased in MCF-7 SPCA2 KD (2KD) cells as confirmed by qPCR, n=3. (H) SPCA2 transcript remains significantly decreased in MCF-7 SPCA2 KD cells which overexpress SPCA1 (2KD+SPCA1), as confirmed by qPCR, n=3. (I-J) Treatment of MCF-7 cells with SKF-96365 (10  $\mu$ M, 65 hours) reduces cell proliferation and viability. n=3. Significance: <sup>ns</sup>  $P > 0.05$ , \* $P < 0.05$ , \*\* $P < 0.01$ , \*\*\* $P < 0.001$ .

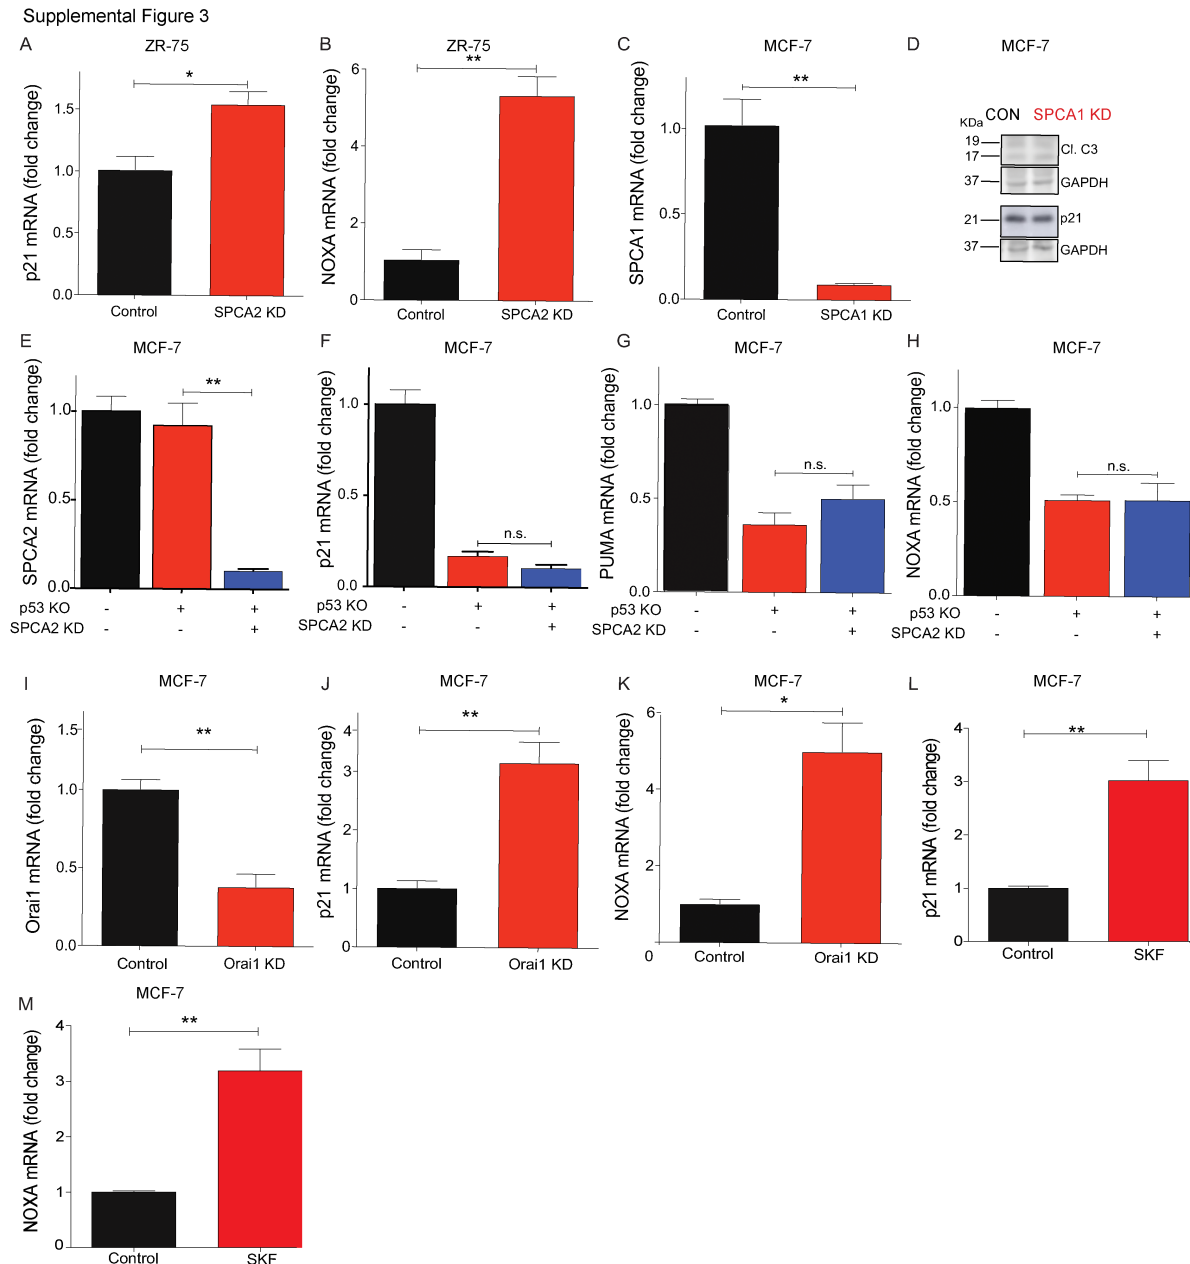

**Figure S3: Store-independent  $\text{Ca}^{2+}$  entry inhibits p53 signaling**

(A-B) SPCA2 KD in ZR-75 cells significantly increased p21 and NOXA,  $n=3$ . (C) Knockdown of SPCA1 in MCF-7 cells was confirmed by qPCR,  $n=3$ . (D) Representative Western blot of cleaved caspase-3 and p21 in MCF-7 control and SPCA1 KD cells; GAPDH was used as a loading control. (E) SPCA2 KD in p53 KO MCF-7 cell line was confirmed by qPCR,  $n=3$ . (F-H) SPCA2 KD did not increase p21, PUMA, and NOXA mRNA in p53 KO MCF-7 cell line, measured by qPCR,  $n=3$ . (I) Orai1 knockdown in MCF-7 was confirmed by qPCR,  $n=3$ . (J-K) Orai1 knockdown in MCF-7 cells increased p21 and NOXA,  $n=3$ . (L-M) Treatment of MCF-7 cells with SKF-96365 (20  $\mu\text{M}$ , 24 hours) increased p21 and NOXA,  $n=3$ . Significance:  $^{ns} P > 0.05$ ,  $^* P < 0.05$ ,  $^{**} P < 0.01$ .

Supplemental Figure 4

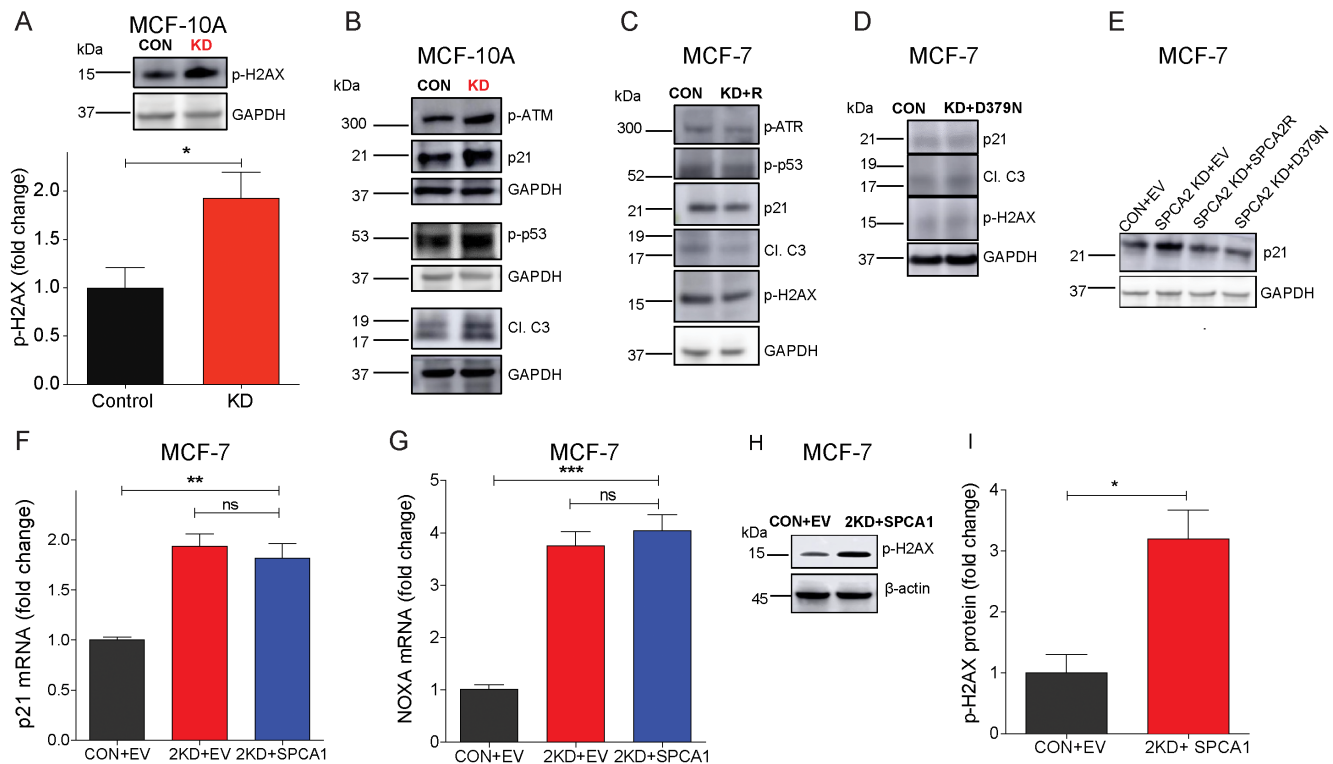**Figure S4: Loss of SPCA2 activates the ATM/ATR-p53 pathway**

(A) Representative Western blot of p-H2AX in MCF-10A control and SPCA2 KD cells; GAPDH was used as a loading control. SPCA2 KD in MCF-10A showed a significant increase in p-H2AX compared to control,  $n=3$ . (B) Representative Western blots of p-ATM, p21, p-p53, and cleaved caspase-3 (Cl. C3) in MCF-10A control and SPCA2 KD cells; GAPDH was used as a loading control. (C) Western blots of p-ATR, p-p53, p21, cleaved caspase-3 (Cl. C3), p-H2AX in MCF-7 control and SPCA2 KD cells transfected with SPCA2R (KD+R); GAPDH was used as a loading control. (D) Western blots of p21, cleaved caspase-3 (Cl. C3), and p-H2AX in MCF-7 control and SPCA2 KD cells transfected with silencing-resistant SPCA2 mutant D379N (KD+D379N), GAPDH was used as a loading control. (E) Western blot of p21 in MCF-7 control + Empty vector (EV), SPCA2 KD +EV, and SPCA2 rescued cells (KD+SPCA2R, and KD+D379N); GAPDH was used as a loading control. (F-G) SPCA1 overexpression in MCF-7 SPCA2 KD cells (2KD+SPCA1) fails to reverse the increase in p21 and NOXA seen in SPCA2 KD cells compared to control.  $n=3$ . (H-I) MCF-7 SPCA2 KD cells, which overexpress SPCA1 (2KD+SPCA1), show an increase in p-H2AX,  $n=3$ ;  $\beta$ -actin was used as a loading control. Significance:  $^{ns} P > 0.05$ ,  $^* P < 0.05$ ,  $^{**} P < 0.01$ ,  $^{***} P < 0.001$ .

Supplemental Figure 5

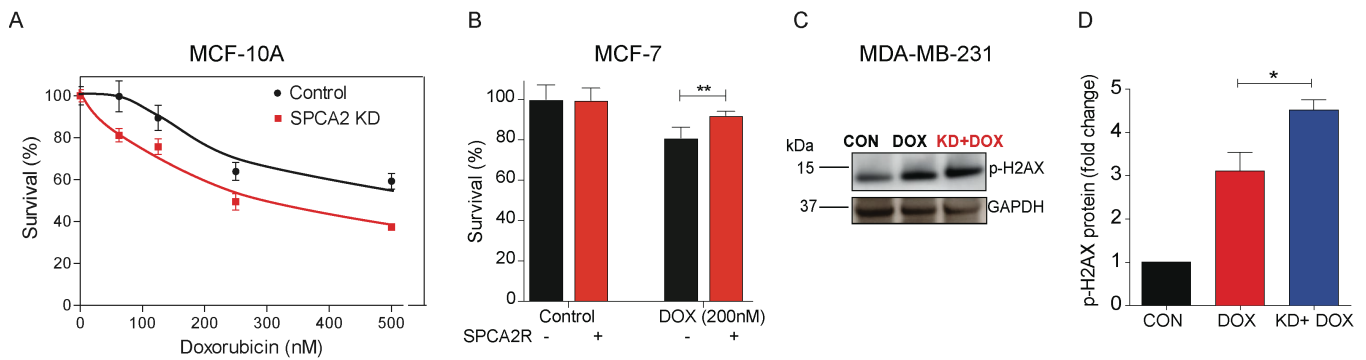

**Figure S5: Loss of SPCA2 expression sensitizes cells to DNA damaging agents**

(A) SPCA2 KD in MCF-10A cells increased chemosensitivity to doxorubicin (0-500 nM) compared to control (n=5 or 6, time=120 hours). (B). Approximately 10,000 cells were plated and incubated overnight. Cells were then treated with doxorubicin (DOX; 200 nM) (time=72 hours). Chemosensitivity to doxorubicin is significantly reversed by forced overexpression of SPCA2R, n=5. (C) Representative western blot of p-H2AX in MDA-MB-231 control and SPCA2 KD cells treated with doxorubicin (DOX) (250 nM, 24 hours); GAPDH was used as a loading control. (D) MDA-MB-231 SPCA2 KD cells treated with doxorubicin showed a significant increase in p-H2AX compared to control cells treated with doxorubicin, n=3. Significance: \* $P < 0.05$ , \*\*  $P < 0.01$ .

Supplemental Figure 6

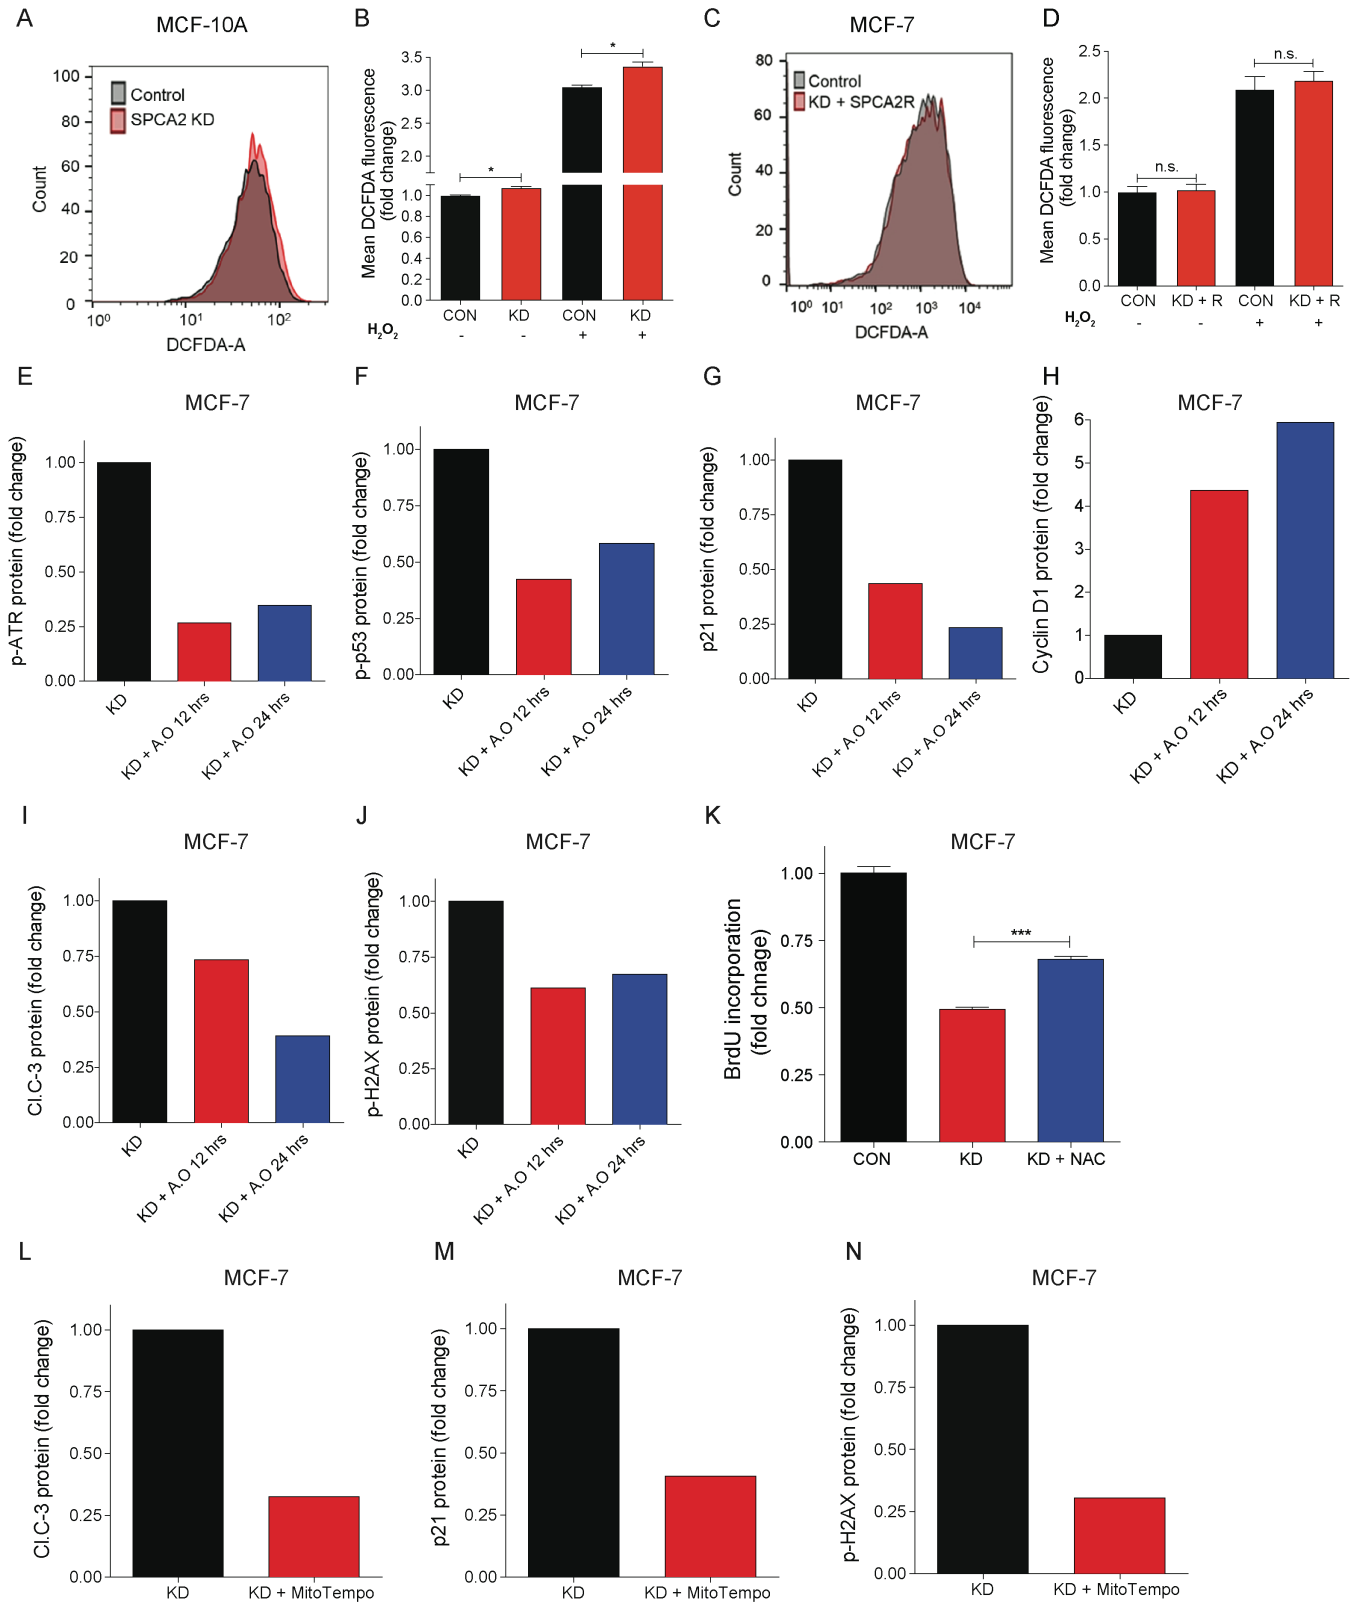

**Figure S6: SPCA2 protects against ROS-mediated DNA damage**

(A) Representative flow cytometry showing ROS production in MCF-10A control and SPCA2 KD cells. (B) ROS production is significantly increased in SPCA2 KD compared to control. H<sub>2</sub>O<sub>2</sub> (500 μM for 20 minutes) was used as positive control. n=3 for SPCA2 KD and control, n=2 for H<sub>2</sub>O<sub>2</sub> experiment. (C) Representative flow cytometry showing ROS production in MCF-7 control and SPCA2 KD rescued (KD + SPCA2R) cells. (D) There was no significant difference in ROS production between control and SPCA2 KD rescued cells, n=3. (E-J) Anti-oxidants (Vitamin C, 500 μM + N-acetyl cysteine, 500 μM) were added to MCF-7 SPCA2 KD cells for 12 hours and 24 hours and immunoblotting is performed using GAPDH as loading control. Quantification of p-ATM, p-p53, p21, cleaved caspase-3, p-H2AX, and Cyclin D1. (K) MCF-7 SPCA2 KD cells were treated with NAC (500 μM) for 24 hours. Cell proliferation was measured using BrdU proliferation assay. NAC treatment significantly rescued the cell proliferation compared to MCF-7 SPCA2 KD cells. n=6 for control, n=5 for KD and n=4 for KD+ NAC (500 μM). (L-N) Mitochondrial anti-oxidant (MitoTempo, 5 μM) was added to MCF-7 SPCA2 KD cells for 24 hours and immunoblotting was performed using GAPDH as loading control. Quantification of cleaved caspase-3, p21 and p-H2AX. Significance: <sup>ns</sup>  $P > 0.05$ , \* $P < 0.05$ .



## Supplemental Figure 7

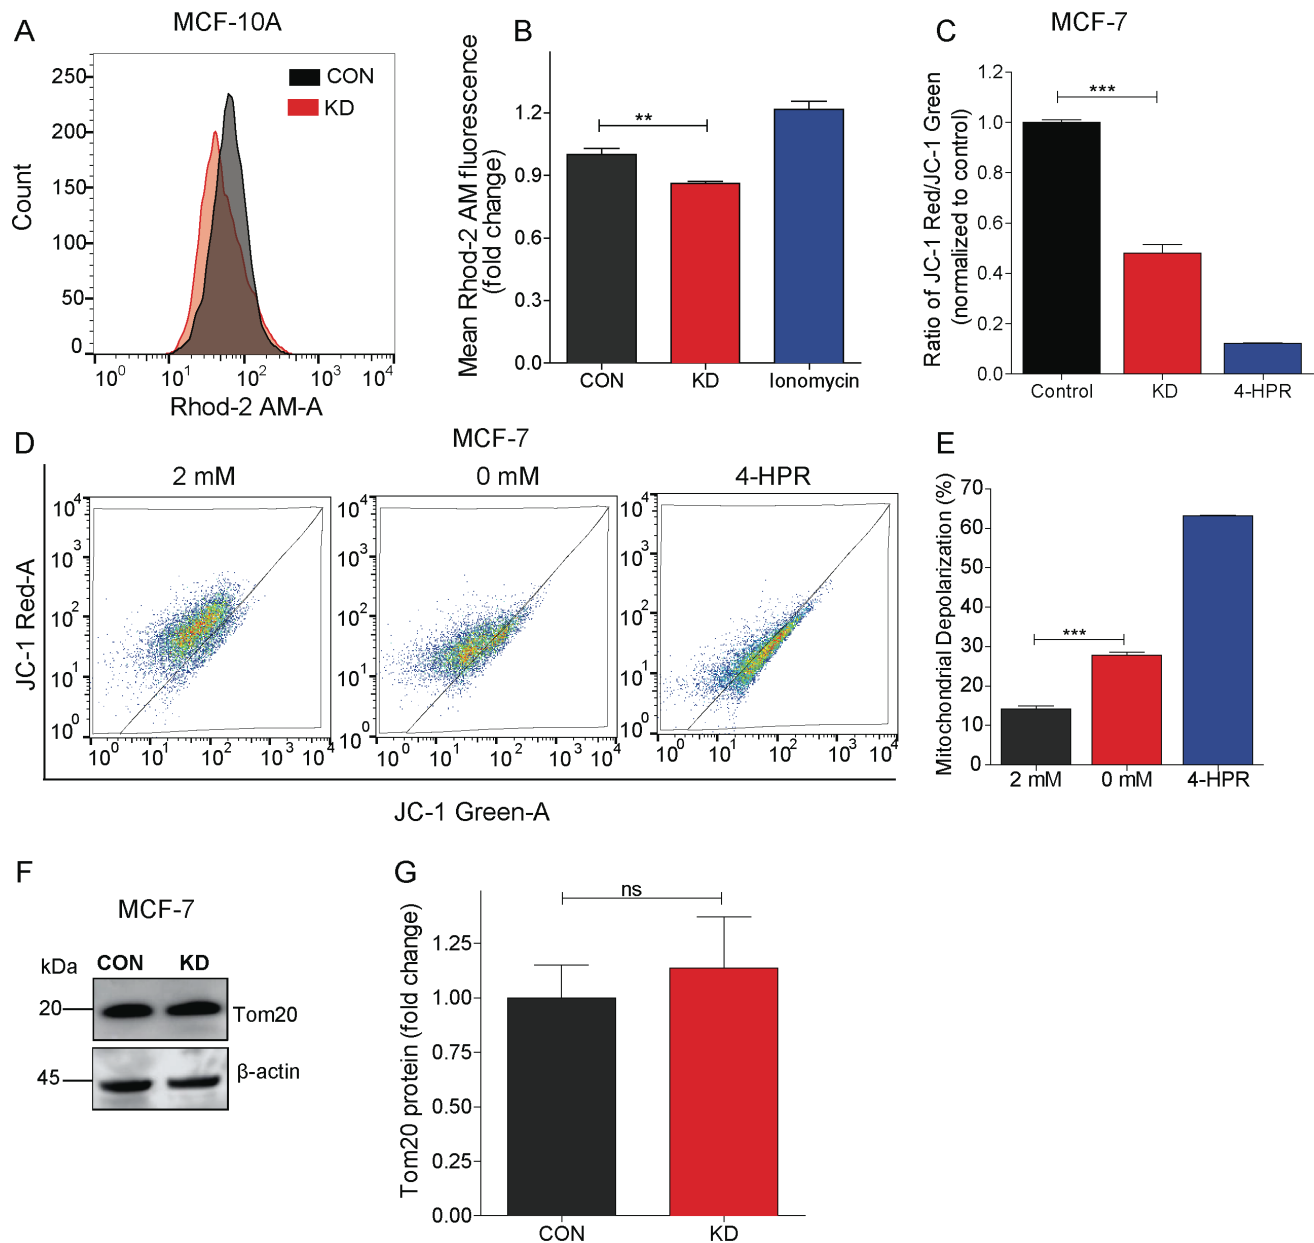

**Figure S7: Loss of SPCA2 and extracellular  $\text{Ca}^{2+}$  decrease mitochondrial  $\text{Ca}^{2+}$  levels and membrane potential**

(A) Representative flow cytometry images showing mitochondrial calcium (Rhod-2 AM fluorescence) in MCF-10A control and SPCA2 KD cells. (B) Quantification of flow cytometry in MCF-10A. Mitochondrial calcium was significantly decreased in SPCA2 knockdown compared to control. Ionomycin ( $10 \mu\text{M}$  for 15 seconds) was used as positive control;  $n=3$ . (C) SPCA2 KD in MCF-7 showing significant decrease in ratio of JC-1 Red/ JC-1 green compared to control.  $n=3$  for control and  $n=4$  for SPCA2 KD. (D) Representative flow cytometry showing mitochondrial membrane depolarization in MCF-7 cells exposed to  $\text{Ca}^{2+}$ -free media for 15 min compared to cells grown in media with 2 mM  $\text{Ca}^{2+}$ . Fenretinide (4-HPR) ( $10 \mu\text{M}$  for 20 hours) was used as

positive control. (E) Mitochondrial membrane depolarization was significantly increased in MCF-7 cells exposed to  $\text{Ca}^{2+}$ -free media compared to cells grown in media with 2 mM  $\text{Ca}^{2+}$ .  $n=3$ . (F-G) Representative Western blot of Tom20 in MCF-7 control and SPCA2 KD cells;  $\beta$ -actin was used as a loading control. SPCA2 KD in MCF-7 did not significantly increase Tom20 protein expression compared to control,  $n=3$ . Significance: <sup>ns</sup>  $P > 0.05$ ,  $*P < 0.05$ ,  $***P < 0.001$ .
